# Supplementary material for: Technical note: Spectral correction for cavity ring-down isotope analysis of plant and soil waters
Source: Copernicus journal article supplement (doi:10.5194/hess-29-3907-2025), 2025-08-22
Supplement: Supplementary file 1 [file hess-29-3907-2025-supplement.pdf]

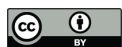

*Supplement of*

## **Technical note: Spectral correction for cavity ring-down isotope analysis of plant and soil waters**

**Gabriel J. Bowen et al.**

*Correspondence to:* Gabriel J. Bowen ([gabe.bowen@utah.edu](mailto:gabe.bowen@utah.edu))

The copyright of individual parts of the supplement might differ from the article licence.

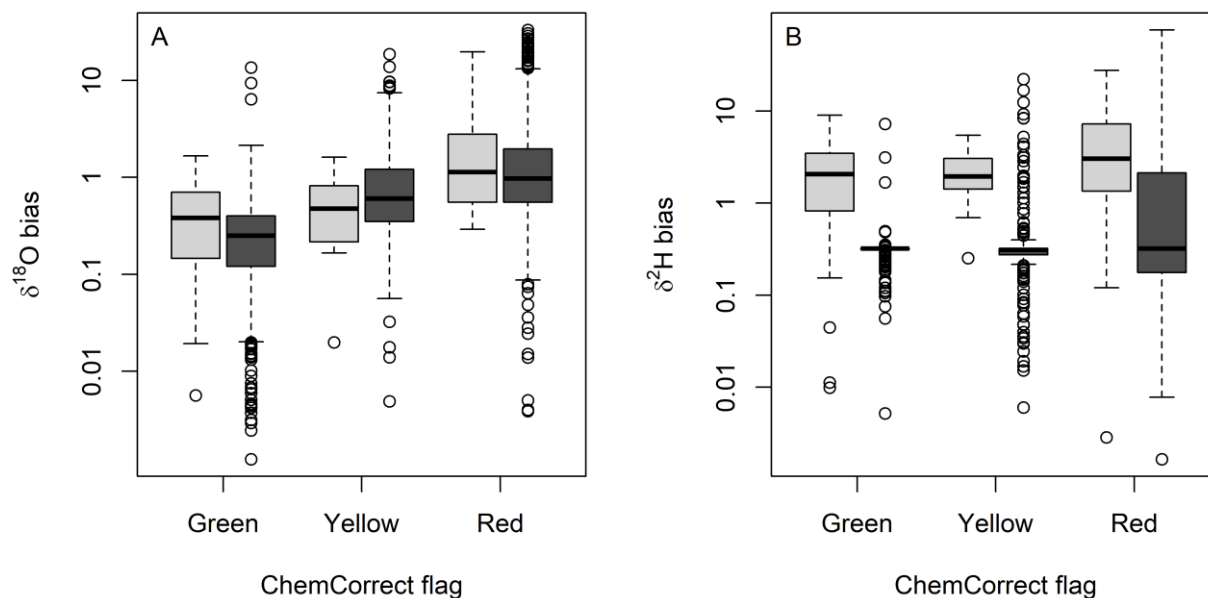

**Figure S1: Observed (light grey) or modelled (dark grey) CRDS measurement bias for oxygen (A) and hydrogen (B) isotope measurements of cryogenically extracted plant xylem and soil water samples. Observed biases are the absolute value of the difference between CRDS and IRMS measurements, modelled biases are the product of the model equations presented in the main text. Observed “biases” also reflect a contribution of measurement uncertainty, which is substantial relative to the actual spectral errors for  $\delta^2\text{H}$  and accounts for the offset between observed and modelled value distributions in panel B. The ChemCorrect flag value shows the highlighting colour assigned by that software, reflecting samples that are free from spectral anomalies suggestive of contamination (Green), suspect (Yellow), or contaminated (Red). For both isotope systems, the average magnitude and prevalence of high-magnitude biases increases with ChemCorrect flagging status, but a small number of samples showing appreciable bias are flagged as Green and a substantial number with little bias are flagged Yellow or Red.**
